# Supplementary material
Source: Springer Nature journal article supplement (https://www.springermedizin.de/resource/supplementary/12992_2009_79_MOESM1_ESM.pdf/9616460)

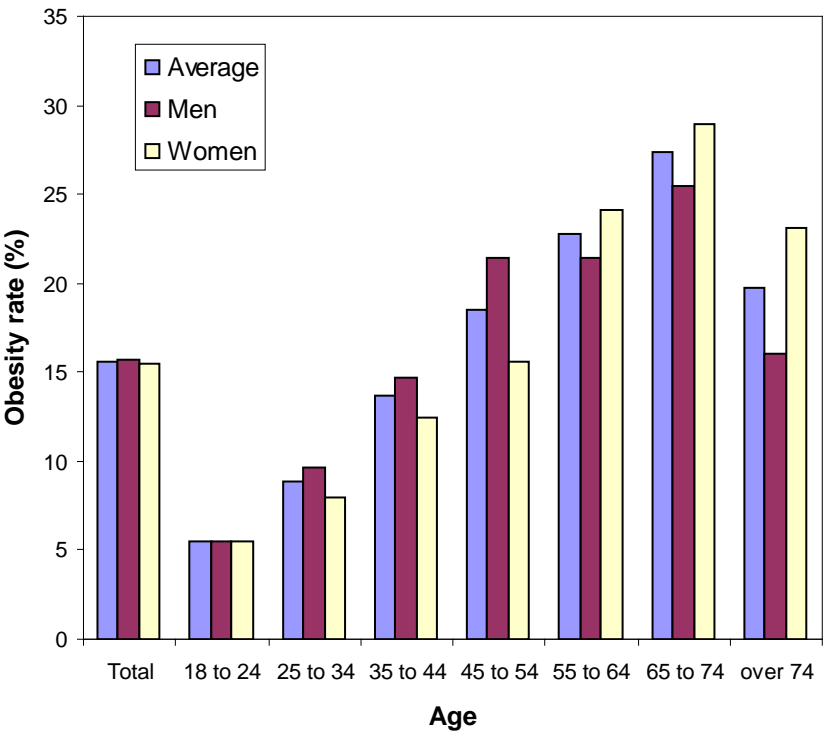

Supplement: MOESM1 [file 9616460]
